# Supplementary material
Source: PubMed Central journal article supplement (PMC6858060)
Supplement: NIHMS903563-supplement-Supp_TableS2.pdf [file NIHMS903563-supplement-Supp_TableS2.pdf]

Supp. Table S2 - Distribution of *TP53* variants by protein domains

| Variant Category                       | Pathogenic (P) | Likely Pathogenic (LP) | Possibly Pathogenic (PP) | Likely Benign (LB) |                | Uncertain Significance (VUS) | Total          |            |
|----------------------------------------|----------------|------------------------|--------------------------|--------------------|----------------|------------------------------|----------------|------------|
|                                        | Non synonymous | Non synonymous         | Non synonymous           | Synonymous         | Non synonymous | Non synonymous               | Non synonymous | Synonymous |
| <b>Protein domain</b>                  |                |                        |                          |                    |                |                              |                |            |
| Transcriptional activation             | 0              | 0                      | 5                        | 16                 | 4              | 2                            | 11             | 16         |
| Proline Rich                           | 0              | 1                      | 0                        | 8                  | 4              | 1                            | 6              | 8          |
| Proline Rich/DNA-binding transition    | 0              | 0                      | 2                        | 2                  | 0              | 0                            | 2              | 2          |
| DNA Binding                            | 18             | 10                     | 14                       | 23                 | 7              | 4                            | 53             | 23         |
| DNA Binding/Oligomerization transition | 0              | 2                      | 3                        | 9                  | 6              | 1                            | 12             | 9          |
| Oligomerization                        | 1              | 1                      | 3                        | 3                  | 7              | 0                            | 12             | 3          |
| Oligom./C-Terminal Reg. transition     | 0              | 0                      | 1                        | 0                  | 0              | 0                            | 1              | 0          |
| C-Terminal Regulatory                  | 0              | 1                      | 0                        | 1                  | 3              | 2                            | 6              | 1          |
| <b>Total</b>                           | <b>19</b>      | <b>15</b>              | <b>28</b>                | <b>62</b>          | <b>31</b>      | <b>10</b>                    | <b>103</b>     | <b>62</b>  |

Tabular representation of Figure 2. According to the NM\_000546.5 reference, domains of TP53 were divided in: transcriptional activation (residues 1 to 62), proline-rich region (residues 63-97), DNA-binding domain (residues 109-288), oligomerization domain (residues 319-359), and C-terminal regulatory domain (residues 363-393). Numbers do not include duplicate values for variants detected in more than one database. Nonsynonymous variants include 1 nonframeshift deletion and 1 nonsense variant. Abbreviations: P, pathogenic; LP, likely pathogenic; PP, possibly pathogenic; LB, likely benign; VUS, variant of uncertain significance.

Supp. Table S3 - Distribution of *TP53* variants across different population ancestries

| Database             | Ancestry                 | Total Individuals | Variant Classification |            |                        |            |                          |            |                       |            |                              |            |
|----------------------|--------------------------|-------------------|------------------------|------------|------------------------|------------|--------------------------|------------|-----------------------|------------|------------------------------|------------|
|                      |                          |                   | Pathogenic (P)         |            | Likely Pathogenic (LP) |            | Possibly Pathogenic (PP) |            | Likely Benign (LB)    |            | Uncertain Significance (VUS) |            |
|                      |                          |                   | Number of Individuals  | Prevalence | Number of Individuals  | Prevalence | Number of Individuals    | Prevalence | Number of Individuals | Prevalence | Number of Individuals        | Prevalence |
| <b>ExAC non-TCGA</b> | African/African American | 4,533             | 2                      | 0.0004     | 1                      | 0.0002     | 8                        | 0.0018     | 32                    | 0.0071     | 1                            | 0.0002     |
|                      | Latino                   | 5,608             | 4                      | 0.0007     | 5                      | 0.0009     | 6                        | 0.0011     | 32                    | 0.0057     | 1                            | 0.0002     |
|                      | East Asian               | 3,933             | 2                      | 0.0005     | 4                      | 0.0010     | 2                        | 0.0005     | 28                    | 0.0071     | 5                            | 0.0013     |
|                      | Finnish                  | 3,307             | 2                      | 0.0006     | 6                      | 0.0018     | 4                        | 0.0012     | 12                    | 0.0036     | 1                            | 0.0003     |
|                      | Non-Finnish European     | 27,173            | 19                     | 0.0007     | 56                     | 0.0021     | 14                       | 0.0005     | 75                    | 0.0028     | 0                            | 0.0000     |
|                      | Other                    | 347               | 0                      | 0.0000     | 0                      | 0.0000     | 0                        | 0.0000     | 0                     | 0.0000     | 0                            | 0.0000     |
|                      | South Asian              | 8,204             | 5                      | 0.0006     | 5                      | 0.0006     | 15                       | 0.0018     | 151                   | 0.0184     | 0                            | 0.0000     |
|                      | Total                    | 53,105            | 34                     | 0.0006     | 77                     | 0.0014     | 49                       | 0.0009     | 330                   | 0.0062     | 8                            | 0.0002     |
| <b>FLOSSIES</b>      | African American         | 2,559             | 0                      | 0.0000     | 2                      | 0.0008     | 8                        | 0.0031     | 18                    | 0.0070     | 2                            | 0.0008     |
|                      | European American        | 7,325             | 1                      | 0.0001     | 14                     | 0.0019     | 6                        | 0.0008     | 26                    | 0.0035     | 1                            | 0.0001     |
|                      | Total                    | 9,884             | 1                      | 0.0001     | 16                     | 0.0016     | 14                       | 0.0014     | 44                    | 0.0045     | 3                            | 0.0003     |
| <b>WES Controls</b>  | European                 | 994               | 1                      | 0.0010     | 2                      | 0.0020     | 1                        | 0.0010     | 3                     | 0.0030     | 0                            | 0.0000     |

Variant distribution across ancestries comprised in each database. Prevalence calculated by the number of individuals within a certain category divided by the total number of individuals of a given ancestry. Abbreviations: WES, Whole-Exome-Sequencing; P, pathogenic; LP, likely pathogenic; PP, possibly pathogenic; LB, likely benign; VUS, variant of uncertain significance.
